# Supplementary material for: Unexpected SiMe3 effect on color-tunable and fluorescent probes of dendritic polyphenyl naphthalimides with aggregation-induced emission enhancement
Source: Royal Society of Chemistry journal article supplement (doi:10.1039/c5tc03344f), 2015-12-17
Supplement: c5tc03344f1.pdf [file c5tc03344f1.pdf]

# Supporting Information

## Unexpected SiMe<sub>3</sub> Effect on Color-tunable and Fluorescent Detection of Novel Dendritic Polyphenyl Naphthalimides with Aggregation-induced Emission Enhancement

Hua Wang, Yan Liang, Huanling Xie, Haifeng Lu, Shigui Zhao\*, Shengyu Feng\*

*School of Chemistry and Chemical Engineering, School of Material Science & Engineer, Key Laboratory of Special Functional Aggregated Materials & Key Laboratory of Colloid and Interface Chemistry (Shandong University), Ministry of Education; Shandong University, Jinan, 250100, People's Republic of China. Fax: +86-531-88564464; Tel: +86-531-88364866; \*E-mail: [fsy@sdu.edu.cn](mailto:fsy@sdu.edu.cn)*

### Experimental Section

#### Materials

Diphenylacetylene and 2, 3, 4, 5-tetraphenylcyclopenta-2, 4-diene-1-one was purchased from Aladdin Industrial Company.

#### Synthesis of hexaphenylbenzene (HPB)

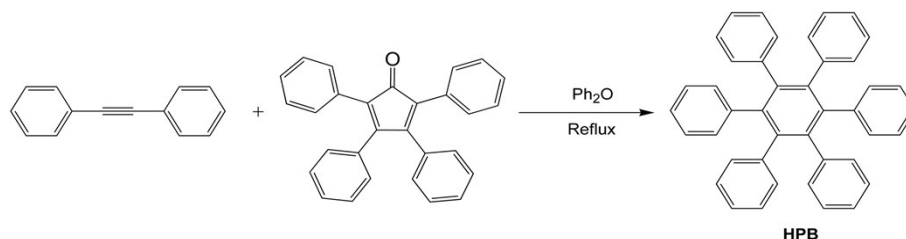

1.78 g (10mmol) diphenylacetylene and 3.07 g (8mmol) 2, 3, 4, 5-tetraphenylcyclopenta-2, 4-diene-1-one were dispersed in 10 mL diphenyl ether. The mixture was refluxed for 2 h under argon. When the mixture was cooled to room temperature, the mixture was poured to 100mL methanol and precipitate was obtained. The product was further purified by silica gel column chromatography. White solid was obtained with a yield of 68%.

<sup>1</sup>H NMR (CDCl<sub>3</sub>, 400MHz, ppm): δ7.41 (m, 30H). <sup>13</sup>C NMR (CDCl<sub>3</sub>, 100MHz, ppm): δ127.6, 127.9, 129.0, 133.6, 134.3. Anal.calcd for C<sub>42</sub>H<sub>30</sub>: C 94.34%, H 5.66%; found: C 94.47%, H 5.53 %.

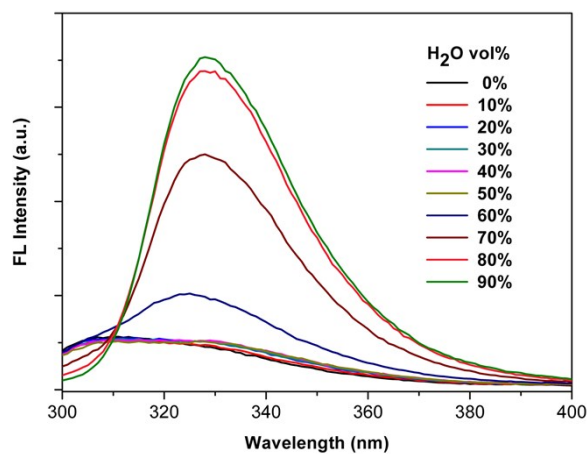

Figure S1. Fluorescence spectra of hexaphenylbenzene in 10 μM THF/H<sub>2</sub>O solvents

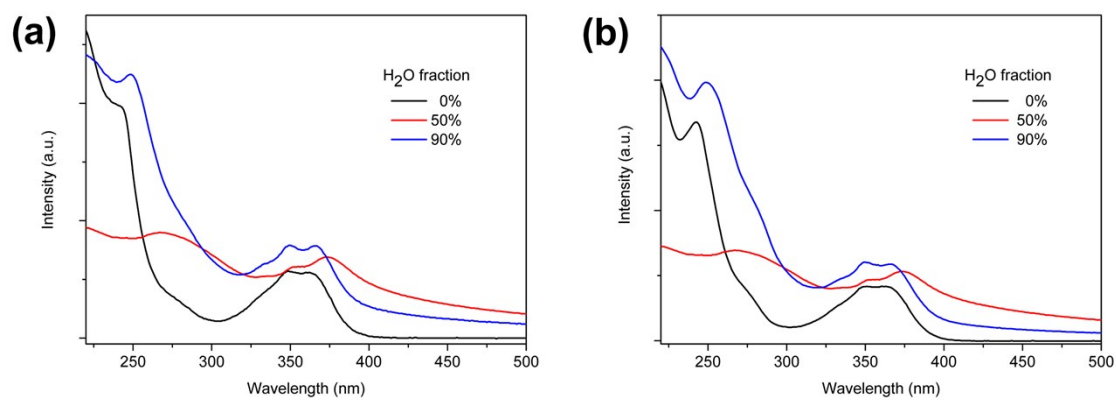

Figure S2. Absorption spectra of **NPI-Ph** (a) and **NPI-Si** (b) in 10 μM THF/H<sub>2</sub>O solvents with different H<sub>2</sub>O fractions
